# Supplementary material
Source: Research Square preprint supplement (doi:10.21203/rs.3.rs-9538306/v1)
Supplement: Supplementary file 1 [file c1f3e15cd67f85d54664d015.docx]

# 2023 "Run for Health · Youth Initiative" Children and Adolescents Themed Fitness Activity Participant Questionnaire and Satisfaction Evaluation

## Part 1 Basic Demographic Information

A1. Did you participate in this themed fitness activity?

A. Yes B. No

A2. Your residential location: ____ Province ____ City

A3. Your gender

A. Male B. Female

A4. Your age: ____ years old

A5. What is your sports proficiency level?

A. Beginner with no sports foundation, participating for the first time

B. Occasional exerciser with average ability

C. Regular exerciser, proficient in 1–2 sports skills

A6. How many times do you exercise per week?

A. 1–2 times B. 3–4 times C. 5 times or more D. Rarely exercise

A7. What is the average duration of each exercise session?

A. Within 30 minutes B. 30–60 minutes C. More than 60 minutes

D. Rarely exercise

A8. Perceived intensity of your usual physical activity

A. Low-intensity activity (no sweating, steady breathing)

B. Moderate-intensity activity (slight sweating, increased breathing rate)

C. High-intensity activity (profuse sweating, shortness of breath)

D. Rarely exercise

A9. Which of the following match your dietary preferences? (Up to 3 options)

A. Have breakfast regularly

B. Frequently consume high-protein food such as beef and mutton

C. Frequently drink sugary beverages such as cola and milk tea

D. Frequently eat snacks

E. Frequently consume fast food such as hamburgers and French friesF. Have dinner on time

G. Frequently eat vegetables and fruits

A10. Do you like physical education classes?

A. Like B. Neutral C. Dislike

A11. Have you ever joined any sports associations, clubs or training institutions?

A. Yes B. No

A12. What impact does regular physical activity have on your academic learning?

A. Promote learning B. Waste time C. No impact

## Part 2 Organizational Characteristics

B1. Where was this themed fitness activity held?

A. Urban area B. Township area

B2. When did you participate in the activity? (Up to 3 options)

A. School days (Monday to Friday)

B. Weekend

C. Legal holidays such as Children’s Day

D. Summer vacation

E. Winter vacation

F. Others

B3. Venue of your participation (Single choice)

A. SchoolB. Public sports stadium

C. Sports school

D. Non-profit sports club

E. Enterprise

F. Children’s Palace

B4. Content of the themed fitness activity you participated in (Up to 3 options)

A. Sports demonstration and exhibition

B. Sports competition

C. Sports skills training

D. Sports cultural exchange

E. Health science popularization

F. Others

B5. Sports events you participated in (Up to 3 options)

A. Team ball games: basketball, volleyball, football, etc.

B. Small ball games: table tennis, badminton, tennis, etc.

C. Artistic sports: gymnastics, aerobics, rhythmic gymnastics, sports dance, etc.

D. Fundamental sports: track and field, swimming, water sports, etc.

E. Ice and snow sports: skiing, skating, ice hockey, etc.

F. Recreational sports: rope skipping, sack game, etc.

G. Emerging sports: skateboarding, roller skating, orienteering, rock climbing, etc.

H. Traditional national sports: martial arts, Sanda, etc.

I. Folk traditional sports: iron hoop rolling, stilt walking, etc.

J. Combat sports: taekwondo, karate, wrestling and judo, etc.

K. Others

B6. How did you sign up for this activity? (Single choice)

A. Registered by parents

B. Recommended by classmates or friends

C. Organized by school

D. Registered by yourself

E. Participated as a club member

F. Others

B7. What benefits have you gained? (Up to 3 options)

A. Making new friends

B. Acquiring sports and health knowledge

C. Mastering at least one sports skill

D. Gaining competition experience

E. Building self-confidence

F. Feeling joyful

G. Enhancing team cooperation awareness

H. Others

B8. Which aspects of the activity need to be improved? (Up to 3 options)

A. Activity organization arrangement

B. Number and attitude of service staff

C. Coach professional level

D. Venue and facility conditions

E. Activity schedule arrangement

F. Others

B9. Would you like to participate in similar themed fitness activities again?

A. Yes B. No

## Part 3 Satisfaction Evaluation

Please read the following items carefully and mark “√” in the corresponding column according to your satisfaction level.

| **No.** | **Evaluation Item** | **Very Satisfied** | **Satisfied** | **Neutral** | **Dissatisfied** | **Very Dissatisfied** |
| --- | --- | --- | --- | --- | --- | --- |
| 1 | Satisfaction with activity registration, check-in and overall organization |  |  |  |  |  |
| 2 | Satisfaction with activity guidelines and supporting materials |  |  |  |  |  |
| 3 | Perceived interestingness of activity content |  |  |  |  |  |
| 4 | Perceived challenge level of activity events |  |  |  |  |  |
| 5 | Perceived richness and diversity of activity content |  |  |  |  |  |
| 6 | Adaptation to the physical load of the activity |  |  |  |  |  |
| 7 | Satisfaction with the duration of each session |  |  |  |  |  |
| 8 | Rationality of activity arrangement by coaches |  |  |  |  |  |
| 9 | Frequency of guidance and assistance provided by coaches |  |  |  |  |  |
| 10 | Satisfaction with coaches’ technical demonstration and teaching |  |  |  |  |  |
| 11 | Perceived patience of coaches |  |  |  |  |  |
| 12 | Satisfaction with the service attitude of staff |  |  |  |  |  |
| 13 | Satisfaction with venue and environmental conditions |  |  |  |  |  |
| 14 | Perceived safety of the activity |  |  |  |  |  |
| 15 | Satisfaction with sports equipment and facilities |  |  |  |  |  |
| 16 | Comfort level of the rest area |  |  |  |  |  |
| 17 | Satisfaction with on-site medical and first-aid services |  |  |  |  |  |
| 18 | Convenience of transportation to the activity venue |  |  |  |  |  |
| 19 | Perceived respect and interpersonal atmosphere during participation |  |  |  |  |  |
| 20 | Satisfaction with activity publicity and promotion |  |  |  |  |  |
